# Supplementary material for: Macrophages in tumor-associated adipose microenvironment accelerate tumor progression
Source: Research Square preprint supplement (doi:10.21203/rs.3.rs-86067/v3), 2021-05-06
Supplement: Supplementary file 1 [file 1875f55d9f840a7048c1371a.docx]

**Table S4. The sequences of siTFE3.**

| Name | Sequences (5’ → 3’) |
| --- | --- |
| siTFE3-#1 | GGAAUCUGCUUGAUGUGUA |
| siTFE3-#2 | GCUCAAGCCUCCCAAUAUC |
| siTFE3-#3 | CGCAGGCGAUUCAACAUUA |
